# Supplementary material
Source: publisher figshare collection journal article supplement (https://acs.figshare.com/ndownloader/files/4070572)
Supplement: Supplementary file 1 [file 4070572]

## Supporting Information:

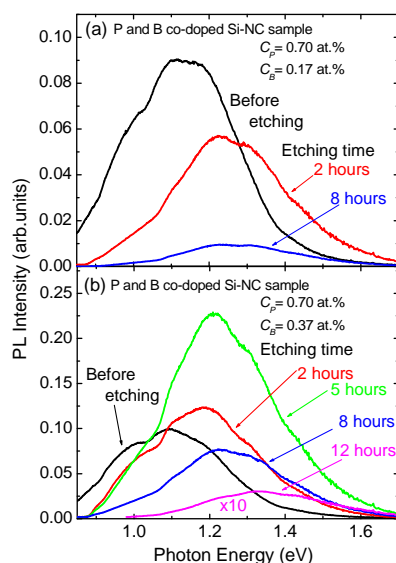

**Figure S1.** PL spectra of P and B co-doped Si-NC samples measured before and during etching in HF solution. (a)  $C_P = 0.70$  at.%,  $C_B = 0.17$  at.%, (b)  $C_P = 0.70$  at.%,  $C_B = 0.37$  at.%. The etching time is shown in the graphs.

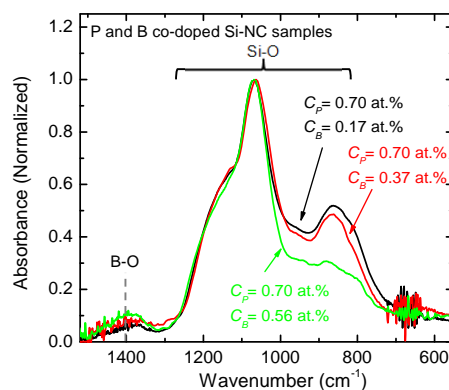

**Figure S2.** IR absorption spectra of P and B co-doped Si-NCs after etching 1 hour in HF solution and kept 4 weeks in methanol. P ( $C_P$ ) and B ( $C_B$ ) concentration in the samples before etching is shown in the graphs. For the measurements, the solutions were dropped on KBr plates and dried in air.
